# Supplementary material for: Age-Related Changes of Plasma Bile Acid Concentrations in Healthy Adults—Results from the Cross-Sectional KarMeN Study
Source: PubMed Central journal article supplement (PMC4836658; doi:10.1371/journal.pone.0153959), 2016-04-19

## S2 Figure. Quantile Regression Plots

Plots displaying association of age and sex on plasma BA concentrations. Lines depict the predicted values according to the median regression model for men (light blue) and women (pink).

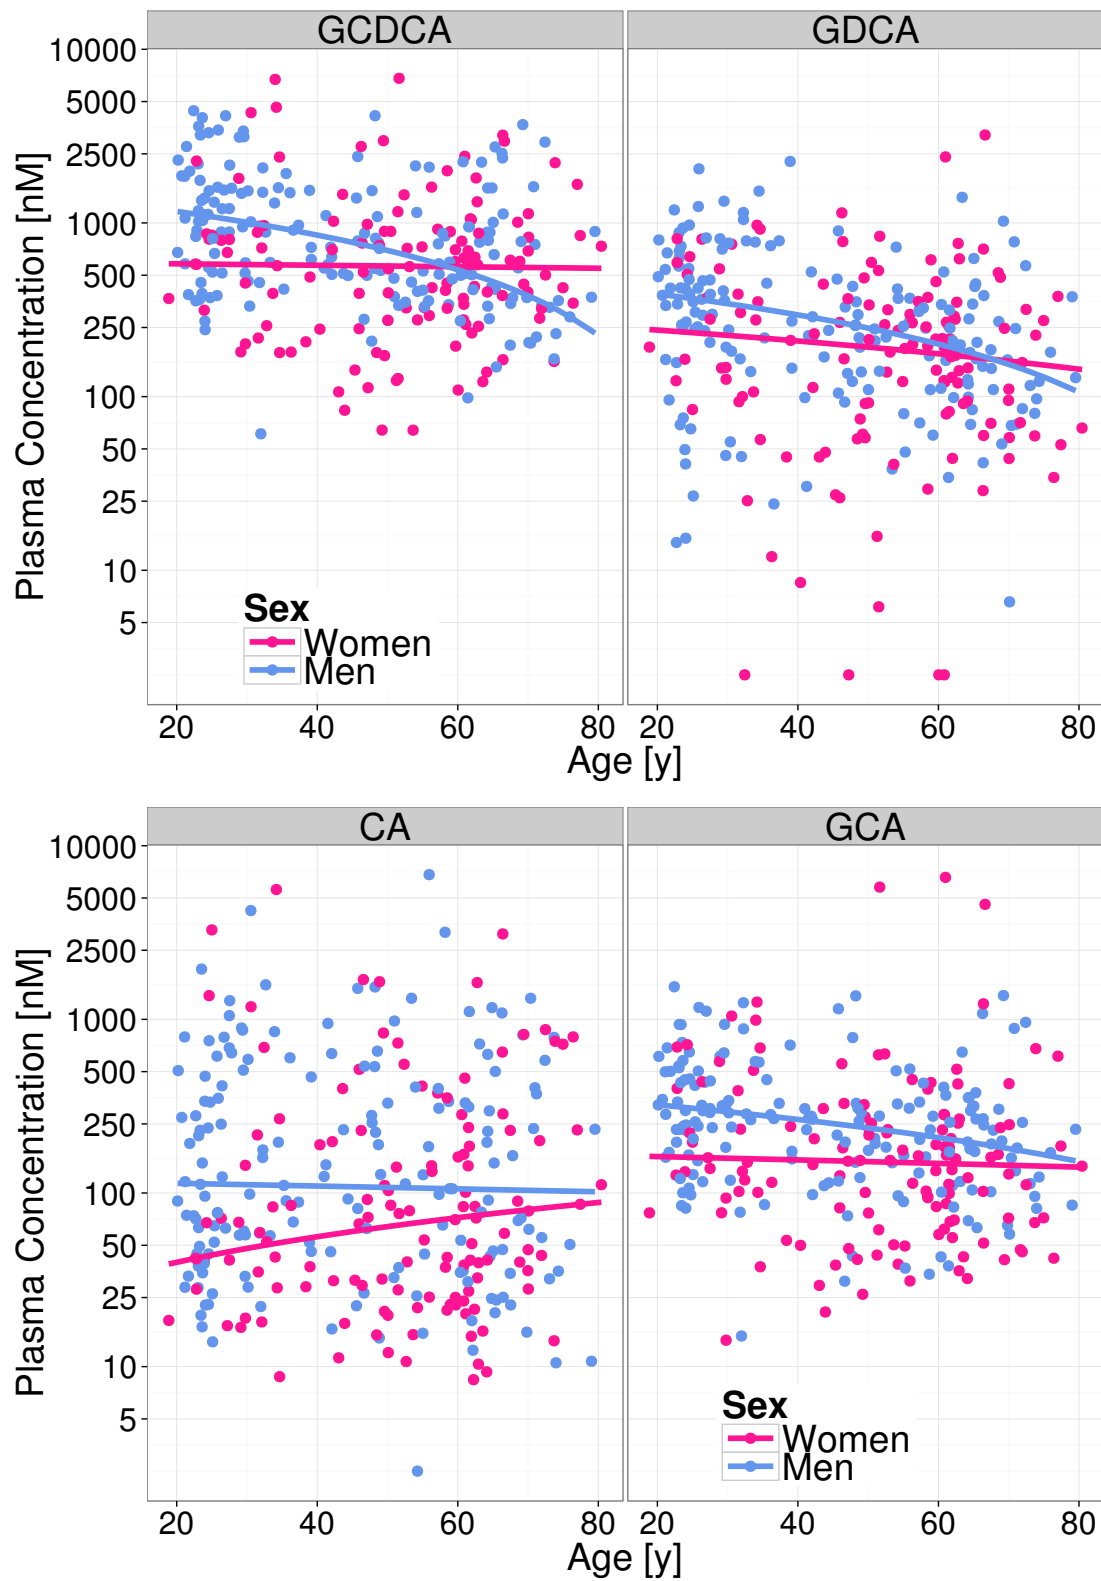

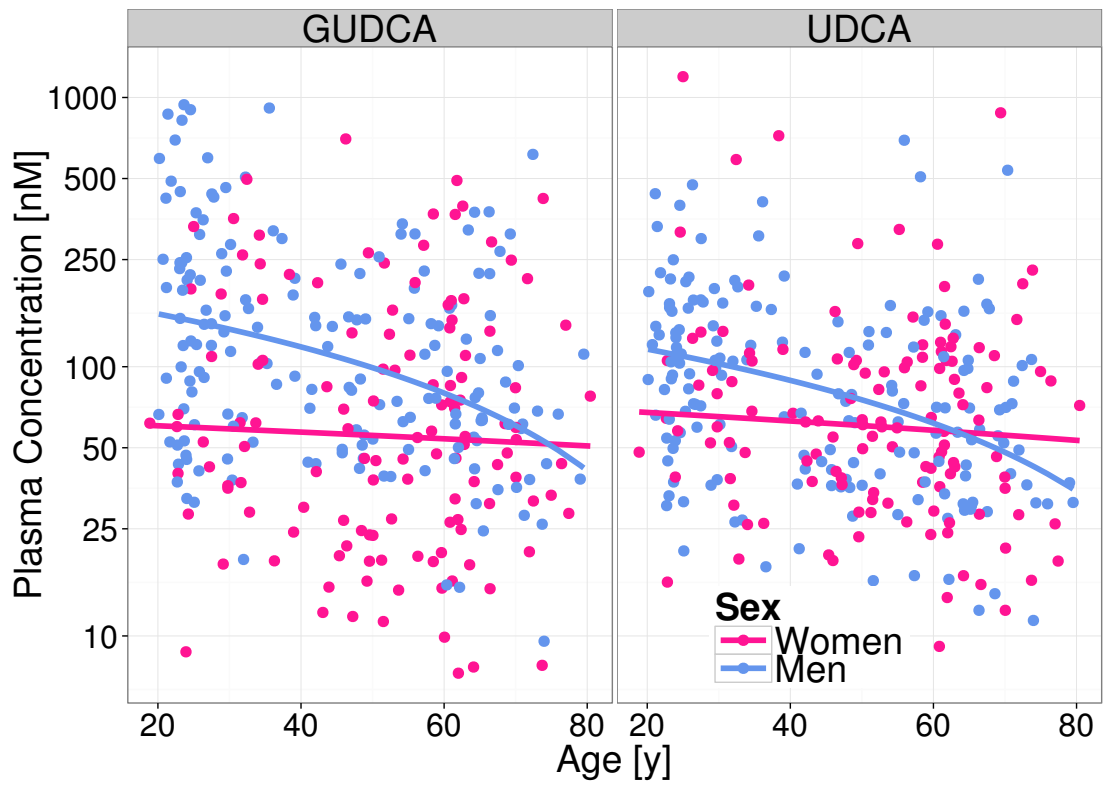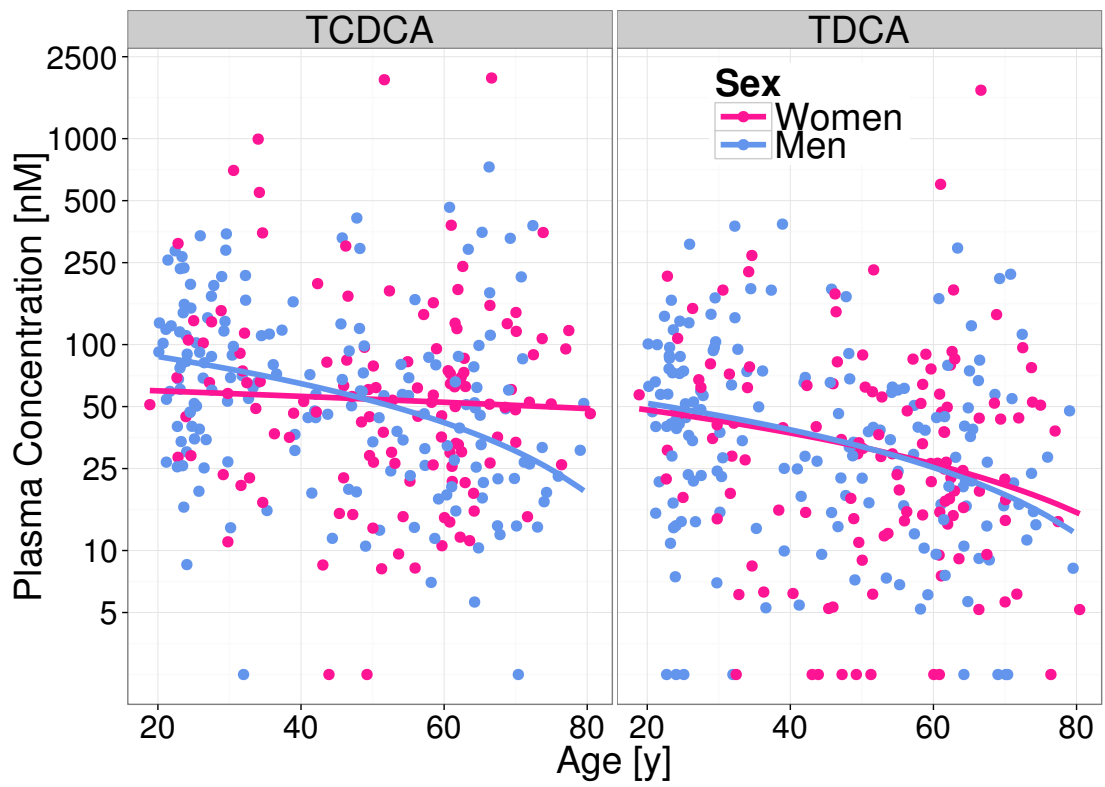

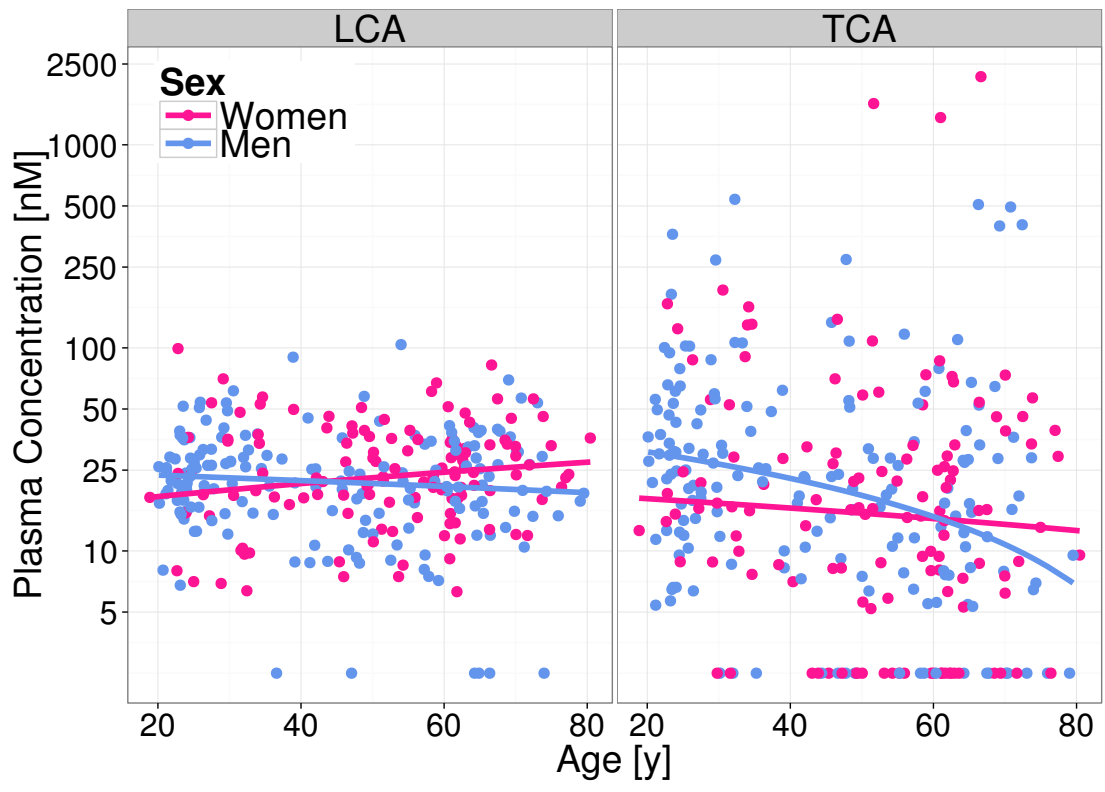

Supplement: pone.0153959.s002.pdf [file pone.0153959.s002.pdf]
