# Supplementary material for: Age-Related Changes of Plasma Bile Acid Concentrations in Healthy Adults—Results from the Cross-Sectional KarMeN Study
Source: PubMed Central journal article supplement (PMC4836658; doi:10.1371/journal.pone.0153959), 2016-04-19
Supplement: pone.0153959.s004.pdf [file pone.0153959.s004.pdf]

**S1 Table. Instrument Settings**

| Q1 [Da]                                                                                                                                                                                            | Q3 [Da] | ID       | DP [Volt] | EP [Volt] | CEP [Volt] | CE [Volt] | CXP [Volt] |
|----------------------------------------------------------------------------------------------------------------------------------------------------------------------------------------------------|---------|----------|-----------|-----------|------------|-----------|------------|
| 407.2                                                                                                                                                                                              | 407.2   | CA 1     | -75       | -9        | -19        | -24       | -5.1       |
| 391.1                                                                                                                                                                                              | 391.1   | DCA 1    | -80       | -10       | -22        | -12       | -6         |
| 375.0                                                                                                                                                                                              | 375.0   | LCA 1    | -95       | -6.5      | -22        | -22       | -4         |
| 391.2                                                                                                                                                                                              | 391.2   | CDCA 1   | -80       | -6        | -26        | -20       | -6         |
| 482.3                                                                                                                                                                                              | 80.1    | TLCA 1   | -100      | -10.5     | -24        | -100      | -9         |
| 391.1                                                                                                                                                                                              | 391.1   | UDCA 1   | -85       | -10.5     | -26        | -16       | -6         |
| 498.2                                                                                                                                                                                              | 79.7    | TCDCA 1  | -95       | -7        | -20        | -104      | -6         |
| 464.3                                                                                                                                                                                              | 74.1    | GCA 1    | -70       | -6.5      | -24        | -70       | -6         |
| 448.2                                                                                                                                                                                              | 73.9    | GCDCA 1  | -80       | -6.5      | -20        | -64       | -55        |
| 498.2                                                                                                                                                                                              | 79.9    | TDCA 1   | -110      | -11.5     | -30        | -106      | -6         |
| 514.2                                                                                                                                                                                              | 79.8    | TCA 1    | -130      | -8        | -24        | -130      | -49        |
| 448.2                                                                                                                                                                                              | 74.0    | GUDCA 1  | -65       | -6        | -20        | -60       | -54        |
| 498.2                                                                                                                                                                                              | 80.1    | TUDCA 1  | -120      | -5        | -28        | -118      | -6         |
| 448.2                                                                                                                                                                                              | 73.9    | GDCA 1   | -75       | -9        | -16        | -66       | -54        |
| 411.2                                                                                                                                                                                              | 411.2   | d4-CA    | -85       | -7        | -16        | -14       | -4         |
| 395.1                                                                                                                                                                                              | 395.1   | d4-DCA   | -70       | -7.5      | -14        | -14       | -4         |
| 452.3                                                                                                                                                                                              | 73.8    | d4-GUDCA | -75       | -5.5      | -20        | -58       | -47        |
| 452.2                                                                                                                                                                                              | 74.1    | d4-GDCA  | -65       | -5.5      | -20        | -54       | -55        |
| 468.3                                                                                                                                                                                              | 73.8    | d4-GCA   | -80       | -6.5      | -22        | -66       | -55        |
| 519.3                                                                                                                                                                                              | 80.1    | d5-TCA   | -110      | -12       | -28        | -110      | -6         |
| Q1 > Q3 MRM transition for respective BA (ID), declustering potential (DP), entry potential (EP), collision cell entry potential (CEP), collision energy (CE), collision cell exit potential (CXP) |         |          |           |           |            |           |            |
