# Supplementary material for: Age-Related Changes of Plasma Bile Acid Concentrations in Healthy Adults—Results from the Cross-Sectional KarMeN Study
Source: PubMed Central journal article supplement (PMC4836658; doi:10.1371/journal.pone.0153959), 2016-04-19
Supplement: pone.0153959.s005.pdf [file pone.0153959.s005.pdf]

## S2 Tables. Validation Parameters

A: precision and accuracy for three different plasma concentrations (n=5)

|              | accuracy [%] |       |        | Coefficient of Variation [%] |       |        |
|--------------|--------------|-------|--------|------------------------------|-------|--------|
|              | 25nM         | 100nM | 1000nM | 25nM                         | 100nM | 1000nM |
| CA Quanti    | 97.7         | 101.4 | 102.6  | 5.3                          | 4.3   | 2.0    |
| DCA Quanti   | 92.0         | 98.9  | 101.8  | 3.2                          | 4.4   | 2.6    |
| LCA Quanti   | 93.1         | 100.7 | 98.0   | 12.4                         | 6.9   | 4.5    |
| CDCA Quanti  | 106.3        | 107.0 | 99.5   | 2.3                          | 3.0   | 5.7    |
| TLCA Quanti  | 90.7         | 100.5 | 103.9  | 3.0                          | 3.8   | 2.4    |
| UDCA Quanti  | 95.5         | 101.2 | 102.3  | 6.3                          | 2.8   | 2.6    |
| TCDCA Quanti | 97.8         | 103.4 | 98.8   | 4.1                          | 3.6   | 3.0    |
| GCA Quanti   | 107.8        | 101.2 | 97.6   | 4.0                          | 2.5   | 2.7    |
| GCDCA Quanti | 107.3        | 102.0 | 100.1  | 9.4                          | 3.0   | 6.1    |
| TDCA Quanti  | 100.5        | 103.3 | 100.4  | 3.6                          | 3.3   | 2.7    |
| TCA Quanti   | 102.4        | 103.1 | 101.9  | 3.4                          | 4.4   | 1.7    |
| GUDCA Quanti | 108.8        | 103.1 | 107.7  | 2.1                          | 4.2   | 1.2    |
| TUDCA Quanti | 94.0         | 105.1 | 101.2  | 4.2                          | 2.6   | 2.9    |
| GDCA Quanti  | 114.6        | 106.5 | 101.2  | 5.1                          | 4.5   | 3.6    |

B: Precision between batches (n=13) determined by pooled QC samples

|                    | CA    | DCA   | LCA  | CDCA  | TLCA | UDCA | TCDC | GCA   | GCDCA | TDCA | TCA  | GUDCA | TUDCA | GDCA  |
|--------------------|-------|-------|------|-------|------|------|------|-------|-------|------|------|-------|-------|-------|
| CV (%)             | 4.6   | 6.7   | 10.8 | 6.6   | n.a. | 5.9  | 4.8  | 5.0   | 4.9   | 6.1  | 13.3 | 4.7   | n.a.  | 5.2   |
| Mean Concentration | 331.2 | 425.2 | 19.9 | 439.4 | n.a. | 95.6 | 97.0 | 324.3 | 877.6 | 55.5 | 53.0 | 121.8 | n.a.  | 301.6 |

C: Recovery and matrix effect (n=5) for spiked plasma samples c=250 nM

|                 | CA   | DCA  | LCA  | CDCA  | TLCA  | UDCA | TCDC  | GCA   | GCDCA | TDCA | TCA   | GUDCA | TUDCA | GDCA  |
|-----------------|------|------|------|-------|-------|------|-------|-------|-------|------|-------|-------|-------|-------|
| Recovery %      | 87.7 | 87.4 | 72.7 | 99.5  | 95.6  | 98.2 | 88.9  | 101.8 | 94.4  | 91.0 | 118.1 | 103.9 | 101.0 | 86.3  |
| Matrix Effect % | 65.4 | 99.9 | 88.2 | 102.6 | 100.9 | 83.6 | 123.0 | 124.9 | 79.4  | 75.0 | 92.5  | 73.9  | 96.9  | 110.8 |
