# Supplementary material for: Age-Related Changes of Plasma Bile Acid Concentrations in Healthy Adults—Results from the Cross-Sectional KarMeN Study
Source: PubMed Central journal article supplement (PMC4836658; doi:10.1371/journal.pone.0153959), 2016-04-19
Supplement: pone.0153959.s006.pdf [file pone.0153959.s006.pdf]

Supplemental Table 3 (A-E): Full model quantile regression for TG (A), LDL (B), HDL (C), BF % (D) and Energy Fat % (E). Sex and age are accounted for. Significant results ( $P < 0.05$ ) are highlighted.

$\beta_0$  Intercept

$\beta_1$  effect of age

$\beta_2$  effect of sex

$\beta_3$  effect of respective parameter of lipid metabolism

$\beta_4$  interaction term age\*sex

$\beta_5$  interaction age\*respective parameter of lipid metabolism

$\beta_6$  interaction sex\*respective parameter of lipid metabolism

$\beta_7$  three way interaction age\*sex\*respective parameter of lipid metabolism

**S3A Table. TG**

| <b>Bile Acid</b>     | $\beta_0$ | $\beta_1$ | $\beta_2$ | $\beta_3$ | $\beta_4$ | $\beta_5$ | $\beta_6$ | $\beta_7$ |
|----------------------|-----------|-----------|-----------|-----------|-----------|-----------|-----------|-----------|
| GCDCA, Estimate      | 743.717   | -15.468   | -226.773  | 2.193     | 19.348    | -0.123    | -5.448    | 0.338     |
| GCDCA, std. Estimate | -0.126    | -0.262    | -0.113    | 0.098     | 0.328     | -0.188    | -0.244    | 0.518     |
| GCDCA, p-Value       | <1e-04    | <1e-04    | 0.01      | 0.145     | 0         | 0.126     | 0.027     | 0.058     |
| DCA, Estimate        | 380.049   | -5.419    | -72.447   | 0.795     | 3.175     | 0.031     | 0.035     | -0.001    |
| DCA, std. Estimate   | -0.099    | -0.218    | -0.085    | 0.084     | 0.128     | 0.113     | 0.004     | -0.005    |
| DCA, p-Value         | <1e-04    | 0         | 0.177     | 0.404     | 0.251     | 0.451     | 0.982     | 0.986     |
| GDCA, Estimate       | 259.604   | -5.399    | -73.312   | 0.886     | 3.585     | -0.044    | -1.702    | 0.110     |
| GDCA, std. Estimate  | -0.094    | -0.245    | -0.097    | 0.106     | 0.162     | -0.182    | -0.204    | 0.449     |
| GDCA, p-Value        | <1e-04    | 0         | 0.143     | 0.154     | 0.247     | 0.289     | 0.223     | 0.175     |
| GCA, Estimate        | 238.799   | -3.280    | -110.946  | 0.379     | 3.396     | 0.001     | -1.247    | 0.040     |
| GCA, std. Estimate   | -0.082    | -0.093    | -0.092    | 0.028     | 0.096     | 0.003     | -0.093    | 0.101     |
| GCA, p-Value         | <1e-04    | 0.001     | 0.001     | 0.409     | 0.117     | 0.964     | 0.183     | 0.561     |
| CDCA, Estimate       | 238.626   | -4.501    | -114.243  | 0.012     | 6.493     | -0.004    | -0.029    | 0.003     |
| CDCA, std. Estimate  | -0.128    | -0.107    | -0.080    | 0.001     | 0.155     | -0.009    | -0.002    | 0.006     |
| CDCA, p-Value        | <1e-04    | 0.004     | 0.003     | 0.989     | 0.007     | 0.914     | 0.981     | 0.979     |
| CA, Estimate         | 112.077   | -0.185    | -56.616   | -0.005    | 1.354     | -0.026    | -0.312    | 0.049     |
| CA, std. Estimate    | -0.155    | -0.004    | -0.040    | -0.000    | 0.033     | -0.057    | -0.020    | 0.107     |
| CA, p-Value          | <1e-04    | 0.896     | 0.051     | 0.994     | 0.446     | 0.415     | 0.678     | 0.386     |
| GUDCA, Estimate      | 107.141   | -2.441    | -50.077   | 0.638     | 2.487     | -0.016    | -0.486    | 0.030     |
| GUDCA, std. Estimate | -0.105    | -0.259    | -0.155    | 0.179     | 0.264     | -0.153    | -0.136    | 0.284     |
| GUDCA, p-Value       | <1e-04    | <1e-04    | 0         | 0.001     | 0         | 0.087     | 0.164     | 0.13      |
| UDCA, Estimate       | 74.504    | -1.456    | -18.807   | 0.143     | 1.517     | 0.001     | -0.240    | 0.020     |
| UDCA, std. Estimate  | -0.120    | -0.197    | -0.075    | 0.051     | 0.205     | 0.011     | -0.086    | 0.250     |
| UDCA, p-Value        | <1e-04    | <1e-04    | 0.017     | 0.231     | 0.007     | 0.902     | 0.186     | 0.154     |
| TCDCA, Estimate      | 56.240    | -1.141    | -8.503    | 0.048     | 1.377     | -0.002    | -0.347    | 0.027     |
| TCDCA, std. Estimate | -0.121    | -0.103    | -0.022    | 0.012     | 0.124     | -0.019    | -0.083    | 0.222     |
| TCDCA, p-Value       | <1e-04    | <1e-04    | 0.259     | 0.666     | 0.003     | 0.723     | 0.019     | 0.07      |
| TDCA, Estimate       | 34.576    | -0.693    | -8.620    | 0.143     | 0.667     | -0.005    | -0.319    | 0.019     |
| TDCA, std. Estimate  | -0.103    | -0.101    | -0.037    | 0.055     | 0.097     | -0.064    | -0.123    | 0.255     |
| TDCA, p-Value        | <1e-04    | <1e-04    | 0.206     | 0.073     | 0.072     | 0.338     | 0.029     | 0.025     |
| LCA, Estimate        | 21.487    | -0.066    | 0.444     | 0.000     | 0.218     | 0.001     | 0.014     | 0.001     |
| LCA, std. Estimate   | -0.151    | -0.074    | 0.014     | 0.001     | 0.243     | 0.057     | 0.042     | 0.105     |
| LCA, p-Value         | <1e-04    | 0.349     | 0.866     | 0.984     | 0.185     | 0.684     | 0.834     | 0.796     |
| TCA, Estimate        | 19.370    | -0.413    | -6.210    | 0.023     | 0.388     | 0.001     | -0.108    | 0.000     |
| TCA, std. Estimate   | -0.099    | -0.038    | -0.017    | 0.006     | 0.036     | 0.006     | -0.026    | 0.004     |
| TCA, p-Value         | <1e-04    | <1e-04    | 0.043     | 0.634     | 0.06      | 0.792     | 0.187     | 0.943     |

**S3B Table. LDL**

| <b>Bile Acid</b>     | $\beta_0$ | $\beta_1$ | $\beta_2$ | $\beta_3$ | $\beta_4$ | $\beta_5$ | $\beta_6$ | $\beta_7$ |
|----------------------|-----------|-----------|-----------|-----------|-----------|-----------|-----------|-----------|
| GCDCA, Estimate      | 678.301   | -12.293   | -102.308  | -1.996    | 8.783     | 0.156     | 1.905     | -0.010    |
| GCDCA, std. Estimate | -0.158    | -0.208    | -0.051    | -0.076    | 0.149     | 0.204     | 0.073     | -0.013    |
| GCDCA, p-Value       | <1e-04    | 0.001     | 0.275     | 0.187     | 0.097     | 0.131     | 0.428     | 0.951     |
| DCA, Estimate        | 380.992   | -3.154    | -57.942   | -1.007    | 2.465     | 0.026     | 1.012     | -0.121    |
| DCA, std. Estimate   | -0.098    | -0.127    | -0.068    | -0.091    | 0.099     | 0.080     | 0.092     | -0.375    |
| DCA, p-Value         | <1e-04    | 0.162     | 0.322     | 0.143     | 0.446     | 0.53      | 0.572     | 0.271     |
| GDCA, Estimate       | 244.368   | -4.298    | -21.832   | -0.627    | 1.001     | 0.034     | 2.116     | -0.116    |
| GDCA, std. Estimate  | -0.114    | -0.195    | -0.029    | -0.064    | 0.045     | 0.118     | 0.216     | -0.405    |
| GDCA, p-Value        | <1e-04    | 0         | 0.583     | 0.246     | 0.668     | 0.249     | 0.088     | 0.098     |
| GCA, Estimate        | 230.311   | -3.044    | -85.500   | -0.057    | 1.908     | 0.026     | 0.257     | -0.004    |
| GCA, std. Estimate   | -0.089    | -0.086    | -0.071    | -0.004    | 0.054     | 0.056     | 0.016     | -0.010    |
| GCA, p-Value         | <1e-04    | 0         | 0.001     | 0.911     | 0.283     | 0.36      | 0.761     | 0.939     |
| CDCA, Estimate       | 225.259   | -2.966    | -99.820   | -0.649    | 5.255     | 0.026     | 0.559     | -0.033    |
| CDCA, std. Estimate  | -0.138    | -0.071    | -0.070    | -0.035    | 0.125     | 0.048     | 0.030     | -0.061    |
| CDCA, p-Value        | <1e-04    | 0.056     | 0.01      | 0.409     | 0.024     | 0.578     | 0.598     | 0.708     |
| CA, Estimate         | 107.880   | -0.154    | -42.054   | -0.175    | 1.110     | 0.007     | -0.023    | -0.007    |
| CA, std. Estimate    | -0.158    | -0.004    | -0.030    | -0.010    | 0.027     | 0.012     | -0.001    | -0.014    |
| CA, p-Value          | 0         | 0.923     | 0.157     | 0.796     | 0.548     | 0.865     | 0.979     | 0.873     |
| GUDCA, Estimate      | 92.037    | -1.625    | -41.561   | -0.069    | 1.050     | 0.017     | 0.227     | 0.001     |
| GUDCA, std. Estimate | -0.152    | -0.172    | -0.129    | -0.017    | 0.111     | 0.140     | 0.054     | 0.012     |
| GUDCA, p-Value       | <1e-04    | 0.026     | 0.007     | 0.839     | 0.205     | 0.371     | 0.649     | 0.962     |
| UDCA, Estimate       | 75.218    | -1.346    | -15.244   | -0.022    | 1.447     | 0.006     | -0.220    | -0.005    |
| UDCA, std. Estimate  | -0.117    | -0.182    | -0.060    | -0.007    | 0.196     | 0.061     | -0.067    | -0.050    |
| UDCA, p-Value        | <1e-04    | 0.001     | 0.127     | 0.924     | 0.047     | 0.597     | 0.562     | 0.844     |
| TCDCA, Estimate      | 51.021    | -0.971    | 3.368     | -0.037    | 0.662     | 0.010     | 0.005     | 0.005     |
| TCDCA, std. Estimate | -0.135    | -0.088    | 0.009     | -0.007    | 0.060     | 0.071     | 0.001     | 0.037     |
| TCDCA, p-Value       | <1e-04    | 0.001     | 0.664     | 0.783     | 0.23      | 0.124     | 0.982     | 0.74      |
| TDCA, Estimate       | 31.621    | -0.548    | -0.677    | -0.071    | 0.092     | 0.005     | 0.046     | -0.000    |
| TDCA, std. Estimate  | -0.116    | -0.080    | -0.003    | -0.023    | 0.013     | 0.055     | 0.015     | -0.002    |
| TDCA, p-Value        | <1e-04    | 0.01      | 0.914     | 0.451     | 0.805     | 0.353     | 0.769     | 0.987     |
| LCA, Estimate        | 22.512    | 0.011     | 0.428     | -0.063    | 0.155     | 0.000     | 0.040     | -0.002    |
| LCA, std. Estimate   | -0.117    | 0.012     | 0.014     | -0.158    | 0.173     | 0.004     | 0.101     | -0.148    |
| LCA, p-Value         | <1e-04    | 0.892     | 0.907     | 0.072     | 0.432     | 0.981     | 0.673     | 0.767     |
| TCA, Estimate        | 17.990    | -0.339    | -2.569    | -0.004    | 0.222     | 0.003     | 0.032     | -0.002    |
| TCA, std. Estimate   | -0.102    | -0.031    | -0.007    | -0.001    | 0.021     | 0.022     | 0.007     | -0.017    |
| TCA, p-Value         | <1e-04    | 0.009     | 0.41      | 0.956     | 0.34      | 0.445     | 0.74      | 0.765     |

**S3C Table. HDL**

| <b>Bile Acid</b>     | $\beta_0$ | $\beta_1$ | $\beta_2$ | $\beta_3$ | $\beta_4$ | $\beta_5$ | $\beta_6$ | $\beta_7$ |
|----------------------|-----------|-----------|-----------|-----------|-----------|-----------|-----------|-----------|
| GCDCA, Estimate      | 739.229   | -12.531   | -186.151  | -1.329    | 16.682    | 0.372     | 3.450     | -0.699    |
| GCDCA, std. Estimate | -0.128    | -0.213    | -0.092    | -0.022    | 0.283     | 0.211     | 0.057     | -0.396    |
| GCDCA, p-Value       | <1e-04    | 0         | 0.065     | 0.792     | 0.007     | 0.244     | 0.607     | 0.107     |
| DCA, Estimate        | 413.826   | -4.983    | -101.670  | 3.117     | 4.110     | -0.152    | -3.548    | 0.100     |
| DCA, std. Estimate   | -0.059    | -0.200    | -0.120    | 0.123     | 0.165     | -0.204    | -0.140    | 0.135     |
| DCA, p-Value         | <1e-04    | 0.001     | 0.038     | 0.089     | 0.191     | 0.188     | 0.195     | 0.567     |
| GDCA, Estimate       | 259.161   | -4.525    | -79.126   | 0.697     | 4.757     | 0.058     | 1.968     | -0.319    |
| GDCA, std. Estimate  | -0.094    | -0.205    | -0.105    | 0.031     | 0.216     | 0.087     | 0.087     | -0.484    |
| GDCA, p-Value        | <1e-04    | 0.002     | 0.047     | 0.651     | 0.032     | 0.525     | 0.448     | 0.016     |
| GCA, Estimate        | 237.170   | -3.082    | -82.730   | -0.466    | 3.228     | -0.013    | 0.356     | -0.047    |
| GCA, std. Estimate   | -0.084    | -0.087    | -0.068    | -0.013    | 0.091     | -0.012    | 0.010     | -0.044    |
| GCA, p-Value         | <1e-04    | 0.015     | 0.002     | 0.765     | 0.066     | 0.893     | 0.882     | 0.711     |
| CDCA, Estimate       | 247.127   | -5.393    | -110.781  | 0.436     | 7.414     | -0.070    | -1.158    | 0.064     |
| CDCA, std. Estimate  | -0.122    | -0.129    | -0.077    | 0.010     | 0.177     | -0.056    | -0.027    | 0.051     |
| CDCA, p-Value        | <1e-04    | 0         | 0.004     | 0.757     | 0.002     | 0.444     | 0.527     | 0.624     |
| CA, Estimate         | 104.907   | 0.312     | -43.806   | -1.447    | 0.494     | 0.049     | 1.516     | -0.050    |
| CA, std. Estimate    | -0.160    | 0.008     | -0.031    | -0.034    | 0.012     | 0.039     | 0.036     | -0.040    |
| CA, p-Value          | 0         | 0.827     | 0.152     | 0.33      | 0.776     | 0.535     | 0.357     | 0.577     |
| GUDCA, Estimate      | 100.755   | -1.587    | -40.985   | -0.587    | 1.240     | 0.040     | -0.020    | -0.019    |
| GUDCA, std. Estimate | -0.125    | -0.168    | -0.127    | -0.061    | 0.131     | 0.143     | -0.002    | -0.069    |
| GUDCA, p-Value       | <1e-04    | 0.008     | 0.014     | 0.333     | 0.169     | 0.269     | 0.983     | 0.702     |
| UDCA, Estimate       | 74.846    | -1.506    | -14.042   | -0.249    | 1.538     | -0.024    | 0.318     | -0.002    |
| UDCA, std. Estimate  | -0.118    | -0.204    | -0.056    | -0.033    | 0.208     | -0.110    | 0.042     | -0.009    |
| UDCA, p-Value        | <1e-04    | <1e-04    | 0.204     | 0.434     | 0.065     | 0.239     | 0.538     | 0.957     |
| TCDCA, Estimate      | 58.106    | -1.251    | -6.493    | 0.149     | 1.194     | -0.017    | 0.117     | 0.003     |
| TCDCA, std. Estimate | -0.116    | -0.113    | -0.017    | 0.013     | 0.108     | -0.050    | 0.010     | 0.010     |
| TCDCA, p-Value       | <1e-04    | 0.001     | 0.507     | 0.741     | 0.045     | 0.542     | 0.842     | 0.924     |
| TDCA, Estimate       | 38.347    | -0.702    | -9.725    | 0.490     | 0.484     | -0.003    | -0.266    | -0.015    |
| TDCA, std. Estimate  | -0.087    | -0.103    | -0.042    | 0.070     | 0.071     | -0.013    | -0.038    | -0.071    |
| TDCA, p-Value        | <1e-04    | 0.004     | 0.156     | 0.066     | 0.217     | 0.878     | 0.498     | 0.578     |
| LCA, Estimate        | 21.953    | -0.120    | 1.982     | 0.036     | 0.308     | -0.007    | 0.053     | -0.006    |
| LCA, std. Estimate   | -0.136    | -0.133    | 0.065     | 0.040     | 0.344     | -0.248    | 0.058     | -0.206    |
| LCA, p-Value         | <1e-04    | 0.156     | 0.32      | 0.677     | 0.015     | 0.254     | 0.707     | 0.561     |
| TCA, Estimate        | 20.394    | -0.450    | -5.153    | 0.101     | 0.385     | -0.014    | -0.063    | 0.011     |
| TCA, std. Estimate   | -0.096    | -0.042    | -0.014    | 0.009     | 0.036     | -0.043    | -0.006    | 0.033     |
| TCA, p-Value         | <1e-04    | <1e-04    | 0.105     | 0.446     | 0.087     | 0.228     | 0.773     | 0.458     |

S3D Table. Body Fat %

| Bile Acid            | $\beta_0$ | $\beta_1$ | $\beta_2$ | $\beta_3$ | $\beta_4$ | $\beta_5$ | $\beta_6$ | $\beta_7$ |
|----------------------|-----------|-----------|-----------|-----------|-----------|-----------|-----------|-----------|
| GCDCA, Estimate      | 679.420   | -11.977   | -50.618   | -11.105   | 13.148    | 0.198     | 4.379     | -0.619    |
| GCDCA, std. Estimate | -0.158    | -0.203    | -0.025    | -0.092    | 0.223     | 0.056     | 0.036     | -0.175    |
| GCDCA, p-Value       | <1e-04    | 0.001     | 0.572     | 0.338     | 0.007     | 0.755     | 0.787     | 0.523     |
| DCA, Estimate        | 399.262   | -4.489    | -153.037  | -0.188    | -0.069    | -0.033    | 6.211     | 0.265     |
| DCA, std. Estimate   | -0.076    | -0.180    | -0.180    | -0.004    | -0.003    | -0.022    | 0.121     | 0.177     |
| DCA, p-Value         | <1e-04    | 0.058     | 0.03      | 0.976     | 0.985     | 0.911     | 0.47      | 0.563     |
| GDCA, Estimate       | 243.481   | -4.289    | -40.952   | -4.167    | 2.143     | 0.041     | 5.154     | -0.084    |
| GDCA, std. Estimate  | -0.115    | -0.194    | -0.054    | -0.092    | 0.097     | 0.031     | 0.114     | -0.063    |
| GDCA, p-Value        | <1e-04    | 0         | 0.36      | 0.21      | 0.466     | 0.834     | 0.398     | 0.831     |
| GCA, Estimate        | 241.993   | -3.071    | -59.439   | 0.932     | 2.449     | 0.028     | -6.647    | 0.063     |
| GCA, std. Estimate   | -0.080    | -0.087    | -0.049    | 0.013     | 0.069     | 0.013     | -0.091    | 0.030     |
| GCA, p-Value         | <1e-04    | 0.002     | 0.047     | 0.668     | 0.157     | 0.85      | 0.128     | 0.815     |
| CDCA, Estimate       | 246.143   | -4.475    | -104.282  | 2.498     | 7.410     | 0.044     | -5.750    | -0.139    |
| CDCA, std. Estimate  | -0.123    | -0.107    | -0.073    | 0.029     | 0.177     | 0.018     | -0.067    | -0.055    |
| CDCA, p-Value        | <1e-04    | 0.018     | 0.038     | 0.603     | 0.001     | 0.855     | 0.313     | 0.677     |
| CA, Estimate         | 106.609   | -0.308    | -36.207   | -1.686    | 1.295     | -0.120    | 0.545     | 0.126     |
| CA, std. Estimate    | -0.159    | -0.007    | -0.026    | -0.020    | 0.031     | -0.048    | 0.006     | 0.051     |
| CA, p-Value          | 0         | 0.847     | 0.304     | 0.722     | 0.521     | 0.575     | 0.916     | 0.6       |
| GUDCA, Estimate      | 106.827   | -2.014    | -57.602   | 1.069     | 1.822     | 0.046     | 0.119     | -0.087    |
| GUDCA, std. Estimate | -0.106    | -0.213    | -0.179    | 0.055     | 0.193     | 0.081     | 0.006     | -0.153    |
| GUDCA, p-Value       | <1e-04    | 0.002     | 0         | 0.537     | 0.03      | 0.615     | 0.956     | 0.422     |
| UDCA, Estimate       | 82.296    | -1.457    | -22.956   | 1.384     | 0.957     | 0.044     | -1.589    | 0.032     |
| UDCA, std. Estimate  | -0.089    | -0.197    | -0.091    | 0.091     | 0.130     | 0.098     | -0.105    | 0.073     |
| UDCA, p-Value        | <1e-04    | 0         | 0.028     | 0.043     | 0.194     | 0.385     | 0.202     | 0.737     |
| TCDCA, Estimate      | 54.799    | -1.041    | 0.256     | -0.482    | 0.798     | 0.009     | -0.215    | 0.027     |
| TCDCA, std. Estimate | -0.125    | -0.094    | 0.001     | -0.021    | 0.072     | 0.013     | -0.009    | 0.041     |
| TCDCA, p-Value       | <1e-04    | <1e-04    | 0.977     | 0.555     | 0.161     | 0.84      | 0.868     | 0.801     |
| TDCA, Estimate       | 31.691    | -0.485    | -0.611    | -0.548    | -0.197    | -0.008    | 0.797     | 0.022     |
| TDCA, std. Estimate  | -0.115    | -0.071    | -0.003    | -0.039    | -0.029    | -0.020    | 0.057     | 0.054     |
| TDCA, p-Value        | <1e-04    | 0.046     | 0.924     | 0.319     | 0.583     | 0.797     | 0.359     | 0.714     |
| LCA, Estimate        | 22.939    | -0.068    | -0.806    | 0.370     | 0.254     | 0.005     | -0.214    | -0.018    |
| LCA, std. Estimate   | -0.103    | -0.076    | -0.026    | 0.201     | 0.283     | 0.096     | -0.116    | -0.325    |
| LCA, p-Value         | <1e-04    | 0.423     | 0.8       | 0.011     | 0.319     | 0.615     | 0.638     | 0.625     |
| TCA, Estimate        | 20.248    | -0.426    | -2.417    | 0.137     | 0.430     | -0.006    | -0.617    | 0.007     |
| TCA, std. Estimate   | -0.096    | -0.040    | -0.007    | 0.006     | 0.040     | -0.010    | -0.028    | 0.012     |
| TCA, p-Value         | <1e-04    | 0         | 0.445     | 0.63      | 0.027     | 0.706     | 0.168     | 0.804     |

**S3E Table. Energy Fat %**

| <b>Bile Acid</b>     | $\beta_0$ | $\beta_1$ | $\beta_2$ | $\beta_3$ | $\beta_4$ | $\beta_5$ | $\beta_6$ | $\beta_7$ |
|----------------------|-----------|-----------|-----------|-----------|-----------|-----------|-----------|-----------|
| GCDCA, Estimate      | 732.740   | -15.057   | -152.840  | 0.408     | 14.331    | -0.114    | -2.471    | 0.232     |
| GCDCA, std. Estimate | -0.131    | -0.255    | -0.076    | 0.004     | 0.243     | -0.037    | -0.024    | 0.076     |
| GCDCA, p-Value       | <1e-04    | <1e-04    | 0.093     | 0.933     | 0.001     | 0.748     | 0.772     | 0.661     |
| DCA, Estimate        | 392.227   | -4.421    | -71.564   | 2.635     | 3.167     | -0.106    | 0.997     | 0.276     |
| DCA, std. Estimate   | -0.084    | -0.178    | -0.084    | 0.060     | 0.127     | -0.082    | 0.023     | 0.213     |
| DCA, p-Value         | <1e-04    | 0.008     | 0.12      | 0.535     | 0.188     | 0.515     | 0.865     | 0.297     |
| GDCA, Estimate       | 260.449   | -4.555    | -75.005   | 0.097     | 4.607     | -0.136    | 3.714     | 0.191     |
| GDCA, std. Estimate  | -0.093    | -0.206    | -0.100    | 0.002     | 0.209     | -0.118    | 0.095     | 0.167     |
| GDCA, p-Value        | <1e-04    | <1e-04    | 0.042     | 0.97      | 0.043     | 0.347     | 0.423     | 0.507     |
| GCA, Estimate        | 243.963   | -2.942    | -96.263   | 1.230     | 2.364     | -0.039    | -1.655    | 0.013     |
| GCA, std. Estimate   | -0.078    | -0.083    | -0.080    | 0.020     | 0.067     | -0.021    | -0.026    | 0.007     |
| GCA, p-Value         | <1e-04    | 0.001     | 0.001     | 0.435     | 0.173     | 0.732     | 0.564     | 0.949     |
| CDCA, Estimate       | 241.453   | -4.639    | -113.118  | 1.680     | 7.342     | -0.096    | -0.446    | 0.205     |
| CDCA, std. Estimate  | -0.126    | -0.111    | -0.079    | 0.023     | 0.175     | -0.044    | -0.006    | 0.094     |
| CDCA, p-Value        | <1e-04    | 0         | 0.002     | 0.483     | <1e-04    | 0.555     | 0.892     | 0.315     |
| CA, Estimate         | 108.608   | -0.243    | -43.328   | -0.068    | 1.148     | 0.006     | 0.259     | 0.010     |
| CA, std. Estimate    | -0.157    | -0.006    | -0.031    | -0.001    | 0.028     | 0.003     | 0.004     | 0.005     |
| CA, p-Value          | <1e-04    | 0.868     | 0.127     | 0.975     | 0.478     | 0.966     | 0.919     | 0.953     |
| GUDCA, Estimate      | 105.773   | -1.892    | -50.046   | -0.946    | 1.852     | -0.022    | 1.732     | 0.017     |
| GUDCA, std. Estimate | -0.109    | -0.201    | -0.155    | -0.056    | 0.196     | -0.044    | 0.103     | 0.035     |
| GUDCA, p-Value       | <1e-04    | 0.001     | 0         | 0.311     | 0.006     | 0.761     | 0.167     | 0.847     |
| UDCA, Estimate       | 78.783    | -1.381    | -13.055   | -0.435    | 1.193     | -0.036    | 1.784     | 0.046     |
| UDCA, std. Estimate  | -0.103    | -0.187    | -0.052    | -0.033    | 0.161     | -0.095    | 0.136     | 0.119     |
| UDCA, p-Value        | <1e-04    | <1e-04    | 0.081     | 0.45      | 0.039     | 0.296     | 0.085     | 0.473     |
| TCDCA, Estimate      | 55.558    | -1.027    | 0.064     | 0.007     | 0.806     | -0.045    | -0.190    | 0.046     |
| TCDCA, std. Estimate | -0.123    | -0.093    | 0.000     | 0.000     | 0.073     | -0.077    | -0.010    | 0.080     |
| TCDCA, p-Value       | <1e-04    | 0         | 0.993     | 0.988     | 0.062     | 0.125     | 0.834     | 0.452     |
| TDCA, Estimate       | 35.361    | -0.593    | -2.324    | 0.118     | 0.093     | -0.021    | -0.026    | 0.035     |
| TDCA, std. Estimate  | -0.100    | -0.087    | -0.010    | 0.010     | 0.014     | -0.060    | -0.002    | 0.098     |
| TDCA, p-Value        | <1e-04    | 0.001     | 0.7       | 0.783     | 0.779     | 0.353     | 0.971     | 0.42      |
| LCA, Estimate        | 22.662    | -0.015    | -0.111    | 0.124     | 0.155     | 0.008     | -0.166    | -0.008    |
| LCA, std. Estimate   | -0.112    | -0.017    | -0.004    | 0.078     | 0.173     | 0.176     | -0.104    | -0.178    |
| LCA, p-Value         | <1e-04    | 0.837     | 0.96      | 0.4       | 0.276     | 0.288     | 0.486     | 0.568     |
| TCA, Estimate        | 19.201    | -0.343    | -3.458    | -0.017    | 0.257     | -0.012    | -0.248    | 0.021     |
| TCA, std. Estimate   | -0.099    | -0.032    | -0.009    | -0.001    | 0.024     | -0.021    | -0.013    | 0.037     |
| TCA, p-Value         | <1e-04    | <1e-04    | 0.212     | 0.898     | 0.132     | 0.141     | 0.413     | 0.306     |
